# Supplementary material
Source: PubMed Central journal article supplement (PMC3104237)
Supplement: pro0020-1077-SD1.pdf [file pro0020-1077-SD1.pdf]

| CCDC Accession Number | Residue No. | Residue Type | $\Theta$ (°) | $d$ (Å) | $\Delta$ (Å) | $\theta$ (°) |
|-----------------------|-------------|--------------|--------------|---------|--------------|--------------|
| OGATAS                | 1           | $\alpha$     | 2.61         | 2.82    | 0.022        | 105.34       |
|                       | 2           | $\beta$      | -4.16        | 3.83    | -0.034       | 128.91       |
|                       | 3           | $\alpha$     | 3.88         | 2.90    | 0.032        | 101.07       |
|                       | 4           | $\beta$      | -0.48        | 3.78    | -0.004       | 89.52        |
| CAXRID                | 1           | $\alpha$     | 0.51         | 2.87    | 0.004        | 99.66        |
|                       | 2           | $\beta$      | 0.32         | 3.39    | 0.003        | 110.43       |
|                       | 3           | $\alpha$     | 3.73         | 2.91    | 0.030        | 115.86       |
|                       | 4           | $\beta$      | -3.67        | 3.63    | -0.030       | 117.21       |
|                       | 5           | $\alpha$     | 4.06         | 2.80    | 0.033        | 107.61       |
|                       | 6           | $\beta$      | -2.42        | 3.68    | -0.020       | 124.10       |
|                       | 7           | $\alpha$     | 4.67         | 2.95    | 0.038        | 106.93       |
|                       | 8           | $\beta$      | -2.34        | 4.81    | -0.020       | 44.68        |
| OGASOF                | 1           | $\alpha$     | 3.23         | 2.92    | 0.026        | 110.60       |
|                       | 2           | $\beta$      | -2.42        | 3.40    | -0.020       | 97.02        |
|                       | 3           | $\alpha$     | 4.27         | 2.86    | 0.035        | 114.92       |
|                       | 4           | $\beta$      | -2.63        | 3.75    | -0.021       | 126.60       |
|                       | 5           | $\alpha$     | 5.13         | 2.84    | 0.042        | 109.19       |
|                       | 6           | $\beta$      | 1.66         | 4.66    | 0.014        | 84.64        |
| OGASUL                | 1           | $\alpha$     | 3.29         | 2.81    | 0.027        | 107.65       |
|                       | 2           | $\beta$      | -2.97        | 3.62    | -0.024       | 118.71       |
|                       | 3           | $\alpha$     | 3.12         | 2.88    | 0.026        | 113.26       |
|                       | 4           | $\beta$      | 1.44         | 4.12    | 0.012        | 107.13       |
|                       | 5           | $\alpha$     | 4.05         | 2.80    | 0.034        | 113.84       |
| OGATEW                | 1           | $\alpha$     | 1.99         | 2.82    | 0.016        | 107.02       |
|                       | 2           | $\beta$      | 2.13         | 3.15    | 0.017        | 104.99       |
|                       | 3           | $\alpha$     | 3.73         | 2.88    | 0.031        | 111.11       |
|                       | 4           | $\beta$      | -3.12        | 3.65    | -0.025       | 112.61       |
|                       | 5           | $\alpha$     | 3.77         | 2.81    | 0.031        | 108.66       |
|                       | 6           | $\beta$      | -2.51        | 3.92    | -0.021       | 125.67       |
|                       | 7           | $\alpha$     | 4.58         | 2.88    | 0.038        | 107.75       |
| OGATIA                | 1           | $\alpha$     | 2.11         | 2.99    | 0.017        | 109.24       |
|                       | 2           | $\beta$      | -1.44        | 3.48    | -0.012       | 99.80        |
|                       | 3           | $\alpha$     | 3.90         | 2.83    | 0.032        | 113.58       |
|                       | 4           | $\beta$      | -2.98        | 3.71    | -0.024       | 121.38       |
|                       | 5           | $\alpha$     | 5.32         | 2.79    | 0.044        | 110.05       |
|                       | 6           | $\beta$      | 0.71         | 4.28    | 0.006        | 65.28        |

| CCDC Accession Number | Residue No. | Residue Type | $\Theta$ (°) | $d$ (Å) | $\Delta$ (Å) | $\theta$ (°) |
|-----------------------|-------------|--------------|--------------|---------|--------------|--------------|
| COVFUP                | 1           | $\alpha$     | 4.68         | 2.98    | 0.038        | 114.17       |
|                       | 2           | $\beta$      | -1.39        | 3.94    | -0.011       | 83.48        |
|                       | 3           | $\alpha$     | 4.11         | 2.82    | 0.033        | 110.75       |
|                       | 4           | $\beta$      | -0.46        | 3.42    | -0.004       | 110.15       |
|                       | 5           | $\alpha$     | 3.53         | 2.90    | 0.029        | 113.35       |
|                       | 6           | $\beta$      | -2.61        | 3.68    | -0.021       | 120.68       |
|                       | 7           | $\alpha$     | 3.50         | 2.94    | 0.029        | 114.34       |
|                       | 8           | $\beta$      | 0.95         | 4.25    | 0.008        | 62.92        |
| OGATOG                | 1           | $\alpha$     | 1.87         | 2.81    | 0.015        | 107.85       |
|                       | 2           | $\beta$      | -1.39        | 3.51    | -0.011       | 103.49       |
|                       | 3           | $\alpha$     | 1.72         | 3.01    | 0.014        | 116.57       |
|                       | 4           | $\beta$      | -1.31        | 3.55    | -0.011       | 107.77       |
|                       | 5           | $\alpha$     | 5.81         | 3.00    | 0.048        | 115.27       |
|                       | 6           | $\beta$      | 0.76         | 4.34    | 0.007        | 74.47        |
| OGATUM                | 1           | $\alpha$     | 0.19         | 2.93    | 0.002        | 102.63       |
|                       | 2           | $\beta$      | -1.07        | 3.48    | -0.009       | 115.67       |
|                       | 3           | $\alpha$     | 2.37         | 2.89    | 0.019        | 110.47       |
|                       | 4           | $\beta$      | -1.87        | 3.61    | -0.015       | 116.51       |
|                       | 5           | $\alpha$     | 2.93         | 2.87    | 0.024        | 112.13       |
|                       | 6           | $\beta$      | -4.41        | 3.73    | -0.036       | 124.47       |
|                       | 7           | $\alpha$     | 4.06         | 2.91    | 0.033        | 103.04       |
|                       | 8           | $\beta$      | -1.10        | 4.92    | -0.009       | 72.80        |
| OGAVAU                | 1           | $\alpha$     | 2.11         | 3.20    | 0.017        | 117.75       |
|                       | 2           | $\beta$      | -1.16        | 4.42    | -0.009       | 85.25        |
|                       | 3           | $\alpha$     | 3.26         | 2.88    | 0.026        | 114.51       |
|                       | 4           | $\beta$      | 0.05         | 3.30    | 0.000        | 108.41       |
|                       | 5           | $\alpha$     | 3.31         | 2.97    | 0.027        | 112.90       |
|                       | 6           | $\beta$      | -3.03        | 3.70    | -0.025       | 118.36       |
|                       | 7           | $\alpha$     | 4.51         | 2.80    | 0.037        | 108.16       |
|                       | 8           | $\beta$      | 1.15         | 4.10    | 0.010        | 68.46        |

| CCDC Accession Number | Residue No. | Residue Type | $\Theta$ (°) | $d$ (Å) | $\Delta$ (Å) | $\theta$ (°) |
|-----------------------|-------------|--------------|--------------|---------|--------------|--------------|
| OGAVEY                | 1           | $\alpha$     | 1.89         | 2.82    | 0.015        | 94.02        |
|                       | 2           | $\beta$      | -2.60        | 4.28    | -0.021       | 89.72        |
|                       | 3           | $\alpha$     | 2.84         | 3.08    | 0.023        | 111.72       |
|                       | 4           | $\beta$      | -0.94        | 4.01    | -0.008       | 84.25        |
|                       | 5           | $\alpha$     | 4.03         | 2.82    | 0.033        | 107.22       |
|                       | 6           | $\beta$      | 3.42         | 4.05    | 0.027        | 85.75        |
|                       | 7           | $\alpha$     | 6.44         | 2.95    | 0.052        | 116.81       |
|                       | 8           | $\beta$      | -2.46        | 4.24    | -0.020       | 88.55        |
|                       | 9           | $\alpha$     | 3.85         | 2.74    | 0.032        | 103.61       |
|                       | 10          | $\beta$      | 0.97         | 3.68    | 0.008        | 60.27        |
| OGAVIC                | 1           | $\alpha$     | ND           | ND      | ND           | ND           |
|                       | 2           | $\beta$      | 0.92         | 3.03    | 0.008        | 104.98       |
|                       | 3           | $\alpha$     | 4.61         | 2.91    | 0.037        | 118.80       |
|                       | 4           | $\beta$      | -0.60        | 3.56    | -0.005       | 114.13       |
|                       | 5           | $\alpha$     | 4.23         | 2.78    | 0.035        | 109.55       |
|                       | 6           | $\beta$      | -0.64        | 4.30    | -0.005       | 125.08       |
|                       | 7           | $\alpha$     | 6.20         | 2.67    | 0.052        | 108.47       |
| OGAVOI                | 1           | $\alpha$     | 4.29         | 3.08    | 0.035        | 114.01       |
|                       | 2           | $\beta$      | -0.37        | 4.42    | -0.003       | 84.39        |
|                       | 3           | $\alpha$     | 2.84         | 2.80    | 0.023        | 111.34       |
|                       | 4           | $\beta$      | 1.62         | 4.36    | 0.013        | 81.33        |
|                       | 5           | $\alpha$     | 5.86         | 2.87    | 0.047        | 109.58       |
|                       | 6           | $\beta$      | ND           | ND      | ND           | ND           |
|                       | 7           | $\alpha$     | ND           | ND      | ND           | ND           |
|                       | 8           | $\beta$      | ND           | ND      | ND           | ND           |
|                       | 9           | $\alpha$     | 6.92         | 2.76    | 0.058        | 108.75       |
| COVGAW                | 1           | $\alpha$     | 3.46         | 2.94    | 0.028        | 106.85       |
|                       | 2           | $\beta$      | -1.22        | 4.51    | -0.010       | 83.23        |
|                       | 3           | $\alpha$     | 2.45         | 2.80    | 0.020        | 110.81       |
|                       | 4           | $\beta$      | 3.51         | 4.18    | 0.028        | 77.57        |
|                       | 5           | $\alpha$     | 3.94         | 2.82    | 0.032        | 111.28       |
|                       | 6           | $\beta$      | 1.17         | 4.00    | 0.009        | 79.87        |
|                       | 7           | $\alpha$     | 6.76         | 3.05    | 0.055        | 114.80       |
|                       | 8           | $\beta$      | -1.43        | 3.85    | -0.012       | 95.38        |
|                       | 9           | $\alpha$     | 2.56         | 2.96    | 0.022        | 109.35       |

| CCDC Accession Number   | Residue No. | Residue Type | $\Theta$ (°) | $d$ (Å) | $\Delta$ (Å) | $\theta$ (°) |
|-------------------------|-------------|--------------|--------------|---------|--------------|--------------|
| PUC CIA                 | 1           | $\alpha$     | 0.94         | 2.84    | 0.008        | 112.55       |
|                         | 2           | $\alpha$     | 4.36         | 2.95    | 0.035        | 123.74       |
|                         | 3           | $\beta$      | -1.39        | 3.66    | -0.011       | 122.00       |
|                         | 4           | $\alpha$     | 4.10         | 2.79    | 0.034        | 103.90       |
|                         | 5           | $\alpha$     | 4.99         | 2.73    | 0.041        | 112.06       |
| PUC COG<br>(molecule 1) | 1           | $\alpha$     | 0.65         | 2.84    | 0.050        | 109.88       |
|                         | 2           | $\alpha$     | 4.09         | 2.81    | 0.034        | 110.99       |
|                         | 3           | $\beta$      | -3.12        | 3.68    | -0.026       | 117.10       |
|                         | 4           | $\alpha$     | 3.22         | 2.81    | 0.026        | 110.57       |
|                         | 5           | $\alpha$     | 4.82         | 3.02    | 0.039        | 126.34       |
|                         | 6           | $\beta$      | ND           | ND      | ND           | ND           |
| PUC COG<br>(molecule 2) | 1           | $\alpha$     | 0.23         | 2.88    | 0.004        | 114.97       |
|                         | 2           | $\alpha$     | 1.72         | 2.87    | 0.030        | 115.82       |
|                         | 3           | $\beta$      | -1.38        | 3.55    | -0.024       | 118.72       |
|                         | 4           | $\alpha$     | 1.32         | 2.86    | 0.023        | 113.81       |
|                         | 5           | $\alpha$     | 1.60         | 2.88    | 0.028        | 116.29       |
|                         | 6           | $\beta$      | ND           | ND      | ND           | ND           |
| PUC DAT                 | 1           | $\beta$      | -2.08        | 3.39    | -0.017       | 102.81       |
|                         | 2           | $\alpha$     | 1.68         | 2.98    | 0.014        | 121.79       |
|                         | 3           | $\alpha$     | 0.18         | 2.97    | 0.020        | 122.17       |
|                         | 4           | $\beta$      | -2.02        | 3.60    | -0.017       | 117.51       |
|                         | 5           | $\alpha$     | 3.11         | 2.82    | 0.025        | 111.06       |
|                         | 6           | $\alpha$     | 1.40         | 3.10    | 0.011        | 125.95       |
|                         | 7           | $\beta$      | 0.97         | 3.44    | 0.008        | 85.16        |
|                         | 8           | $\alpha$     | 5.61         | 2.74    | 0.047        | 107.08       |

| CCDC Accession Number | Residue No. | Residue Type | $\Theta$ (°) | $d$ (Å) | $\Delta$ (Å) | $\theta$ (°) |
|-----------------------|-------------|--------------|--------------|---------|--------------|--------------|
| PUCDOH                | 1           | $\beta$      | 0.88         | 3.34    | 0.070        | 104.15       |
|                       | 2           | $\alpha$     | 2.39         | 2.95    | 0.019        | 120.18       |
|                       | 3           | $\alpha$     | 2.05         | 2.98    | 0.016        | 122.86       |
|                       | 4           | $\beta$      | 0.37         | 3.22    | 0.003        | 104.32       |
|                       | 5           | $\alpha$     | 2.76         | 2.84    | 0.022        | 109.58       |
|                       | 6           | $\alpha$     | 2.24         | 3.05    | 0.018        | 124.14       |
|                       | 7           | $\beta$      | -1.80        | 3.51    | -0.015       | 114.82       |
|                       | 8           | $\alpha$     | 1.97         | 2.84    | 0.022        | 109.58       |
|                       | 9           | $\alpha$     | 0.60         | 3.06    | 0.005        | 122.89       |
|                       | 10          | $\beta$      | 0.23         | 3.50    | 0.002        | 95.73        |
|                       | 11          | $\alpha$     | 4.93         | 2.79    | 0.041        | 106.50       |

| CCDC Accession Number | Residue No. | Residue Type | $\Theta$ (°) | $d$ (Å) | $\Delta$ (Å) | $\theta$ (°) |
|-----------------------|-------------|--------------|--------------|---------|--------------|--------------|
| PUCCAS                | 1           | $\beta$      | -2.60        | 3.68    | -0.021       | 91.88        |
|                       | 2           | $\beta$      | -0.42        | 3.22    | -0.003       | 110.00       |
|                       | 3           | $\alpha$     | 4.59         | 2.91    | 0.037        | 116.97       |
|                       | 4           | $\beta$      | -0.56        | 4.09    | -0.004       | 127.13       |
|                       | 5           | $\beta$      | -0.61        | 3.96    | -0.005       | 90.67        |
|                       | 6           | $\alpha$     | 3.79         | 2.74    | 0.032        | 110.00       |
| GEFXAR                | 1           | $\beta$      | -1.45        | 3.80    | -0.012       | 109.88       |
|                       | 2           | $\beta$      | -0.47        | 3.03    | -0.004       | 103.52       |
|                       | 3           | $\alpha$     | 2.85         | 3.05    | 0.023        | 120.14       |
|                       | 4           | $\beta$      | -1.34        | 3.72    | 0.011        | 111.05       |
|                       | 5           | $\beta$      | -1.53        | 3.34    | 0.012        | 105.65       |
|                       | 6           | $\alpha$     | ND           | ND      | ND           | ND           |
| PUCCEW                | 1           | $\beta$      | -4.19        | 3.67    | -0.034       | 78.84        |
|                       | 2           | $\beta$      | -1.51        | 3.27    | -0.012       | 115.45       |
|                       | 3           | $\alpha$     | -0.57        | 3.04    | -0.005       | 119.68       |
|                       | 4           | $\beta$      | -2.62        | 3.86    | -0.021       | 110.71       |
|                       | 5           | $\beta$      | 0.42         | 3.17    | 0.004        | 98.86        |
|                       | 6           | $\alpha$     | 0.77         | 2.90    | 0.006        | 110.41       |
| PUCCEM                | 1           | $\alpha$     | 4.31         | 2.88    | 0.035        | 108.34       |
|                       | 2           | $\beta$      | -5.23        | 3.66    | -0.043       | 115.09       |
|                       | 3           | $\beta$      | -5.27        | 3.46    | -0.043       | 105.64       |
|                       | 4           | $\alpha$     | 4.37         | 2.95    | 0.035        | 119.08       |
|                       | 5           | $\beta$      | -0.70        | 3.86    | -0.006       | 114.81       |
|                       | 6           | $\beta$      | -2.23        | 3.65    | -0.018       | 110.68       |
|                       | 7           | $\alpha$     | 3.66         | 2.83    | 0.030        | 111.32       |
|                       | 8           | $\beta$      | 0.56         | 3.99    | 0.005        | 134.27       |
|                       | 9           | $\beta$      | -4.14        | 4.39    | -0.034       | 104.35       |
|                       | 10          | $\alpha$     | 4.11         | 2.67    | 0.035        | 108.52       |

| CCDC Accession Number | Residue No. | Residue Type | $\Theta$ (°) | $d$ (Å) | $\Delta$ (Å) | $\theta$ (°) |
|-----------------------|-------------|--------------|--------------|---------|--------------|--------------|
| PUCDEX                | 1           | $\alpha$     | 4.88         | 2.89    | 0.040        | 110.27       |
|                       | 2           | $\beta$      | -0.28        | 3.61    | -0.002       | 94.72        |
|                       | 3           | $\beta$      | -0.19        | 3.36    | -0.002       | 100.60       |
|                       | 4           | $\alpha$     | 5.13         | 2.98    | 0.042        | 116.69       |
|                       | 5           | $\beta$      | -0.46        | 3.51    | -0.004       | 95.10        |
|                       | 6           | $\beta$      | -1.53        | 3.24    | -0.013       | 99.08        |
|                       | 7           | $\alpha$     | 5.41         | 2.95    | 0.044        | 117.56       |
|                       | 8           | $\beta$      | 0.37         | 3.83    | 0.003        | 117.32       |
|                       | 9           | $\beta$      | -0.23        | 3.99    | -0.002       | 107.58       |
|                       | 10          | $\alpha$     | 5.09         | 2.73    | 0.043        | 108.86       |
| PUCDIB                | 1           | $\alpha$     | 3.17         | 2.90    | 0.026        | 109.80       |
|                       | 2           | $\beta$      | ND           | ND      | ND           | ND           |
|                       | 3           | $\beta$      | ND           | ND      | ND           | ND           |
|                       | 4           | $\alpha$     | ND           | ND      | ND           | ND           |
|                       | 5           | $\beta$      | ND           | ND      | ND           | ND           |
|                       | 6           | $\beta$      | -2.68        | 3.92    | -0.022       | 103.18       |
|                       | 7           | $\alpha$     | 3.08         | 2.66    | 0.026        | 99.95        |
| PUCDUN                | 1           | $\alpha$     | 0.65         | 3.14    | 0.005        | 123.89       |
|                       | 2           | $\beta$      | -1.43        | 3.54    | -0.012       | 99.55        |
|                       | 3           | $\beta$      | -0.19        | 3.31    | -0.001       | 99.01        |
|                       | 4           | $\alpha$     | 5.30         | 2.95    | 0.043        | 116.21       |
|                       | 5           | $\beta$      | -0.19        | 3.83    | -0.001       | 113.20       |
|                       | 6           | $\beta$      | -1.63        | 3.58    | -0.013       | 112.38       |
|                       | 7           | $\alpha$     | 1.71         | 3.07    | 0.014        | 121.57       |
|                       | 8           | $\beta$      | -0.79        | 3.62    | -0.007       | 110.05       |
|                       | 9           | $\beta$      | -1.02        | 3.55    | -0.008       | 106.21       |
|                       | 10          | $\alpha$     | 4.58         | 2.75    | 0.038        | 93.28        |
